# Supplementary material for: A highly selective and sensitive fluorescence “turn-on” fluoride ion sensor
Source: Royal Society of Chemistry journal article supplement (doi:10.1039/c4ra09624j), 2015-01-01
Supplement: c4ra09624j1.pdf [file c4ra09624j1.pdf]

## Electronic Supplementary Information

### A highly selective and sensitive fluorescence “turn-on” fluoride ion sensor

Qi Lin,\* Qing-Ping Yang, Bin Sun, Jin-Chao Lou, Tai-Bao Wei\*, You-Ming Zhang\*

-----  
E-mail: [linqi2004@126.com](mailto:linqi2004@126.com), \* [zhangnwnu@126.com](mailto:zhangnwnu@126.com)\*  
-----

Key Laboratory of Eco-Environment-Related Polymer Materials of Ministry of Education, Gansu Key Laboratory of Polymer Materials, College of Chemistry and Chemical Engineering, Northwest Normal University, Lanzhou 730070, China

### Contents

|                                                              |           |
|--------------------------------------------------------------|-----------|
| <b>Materials and instruments and General procedures.....</b> | <b>S2</b> |
| <b>Figure S1.....</b>                                        | <b>S3</b> |
| <b>Figure S2, Figure S3.....</b>                             | <b>S4</b> |
| <b>Figure S4, Figure S5.....</b>                             | <b>S5</b> |
| <b>Figure S6, Figure S7.....</b>                             | <b>S6</b> |
| <b>Figure S8, Figure S9.....</b>                             | <b>S7</b> |
| <b>Figure S10.....</b>                                       | <b>S8</b> |

-----  
\* Corresponding author

Tel: +8609317973120. E-mail address: [linqi2004@126.com](mailto:linqi2004@126.com), [zhangnwnu@126.com](mailto:zhangnwnu@126.com)

## **Materials and instruments and General procedures**

### **Materials and instruments**

All reagents and starting materials were obtained from commercial suppliers and used as received unless otherwise noted.  $F^-$ ,  $Cl^-$ ,  $Br^-$ ,  $I^-$ ,  $AcO^-$ ,  $H_2PO_4^-$ ,  $HSO_4^-$ ,  $ClO_4^-$ , were used as the tetrabutylammonium (TBA) salts and the  $SCN^-$  and  $CN^-$  ions were used as the sodium salts. Nuclear magnetic resonance (NMR) spectra were recorded on Varian Mercury 400. Mass spectra were recorded on a Bruker Esquire 6000 MS instrument. Fluorescence spectra were recorded on a Shimadzu RF-5301PC spectrofluorophotometer. Ultraviolet-visible (UV-vis) spectra were recorded on a Shimadzu UV-2550 spectrometer.

### **General procedure**

#### **1. General procedure for UV-vis experiments**

All the UV-vis experiments were carried out on a Shimadzu UV-2550 spectrometer. Any changes in the UV-vis spectra of the synthesized sensors were recorded on the addition of  $F^-$  (measured 0.5 mL 0.1 mol/L diluted to 0.01 mol/L). The host concentration was kept constant in all experiments.

#### **2. General procedure for fluorescence experiments**

All the fluorescence experiments were carried out on a Shimadzu RF-5301PC spectrofluorophotometer. Any changes in the fluorescence spectra of the synthesized sensors were recorded on the addition of  $F^-$  (measured 0.5 mL 0.1 mol/L diluted to 0.01 mol/L). The host concentration was kept constant in all experiments.

#### **3. General procedure for $^1H$ NMR titration**

For  $^1H$  NMR titrations, two stock solutions were prepared in  $DMSO-d_6$ : one of them contained the host only, the second one contained a certain concentration of  $F^-$  (measured 0.5 mL 0.1 mol/L diluted to 0.01 mol/L). Aliquots of the solutions were mixed directly in NMR tubes.

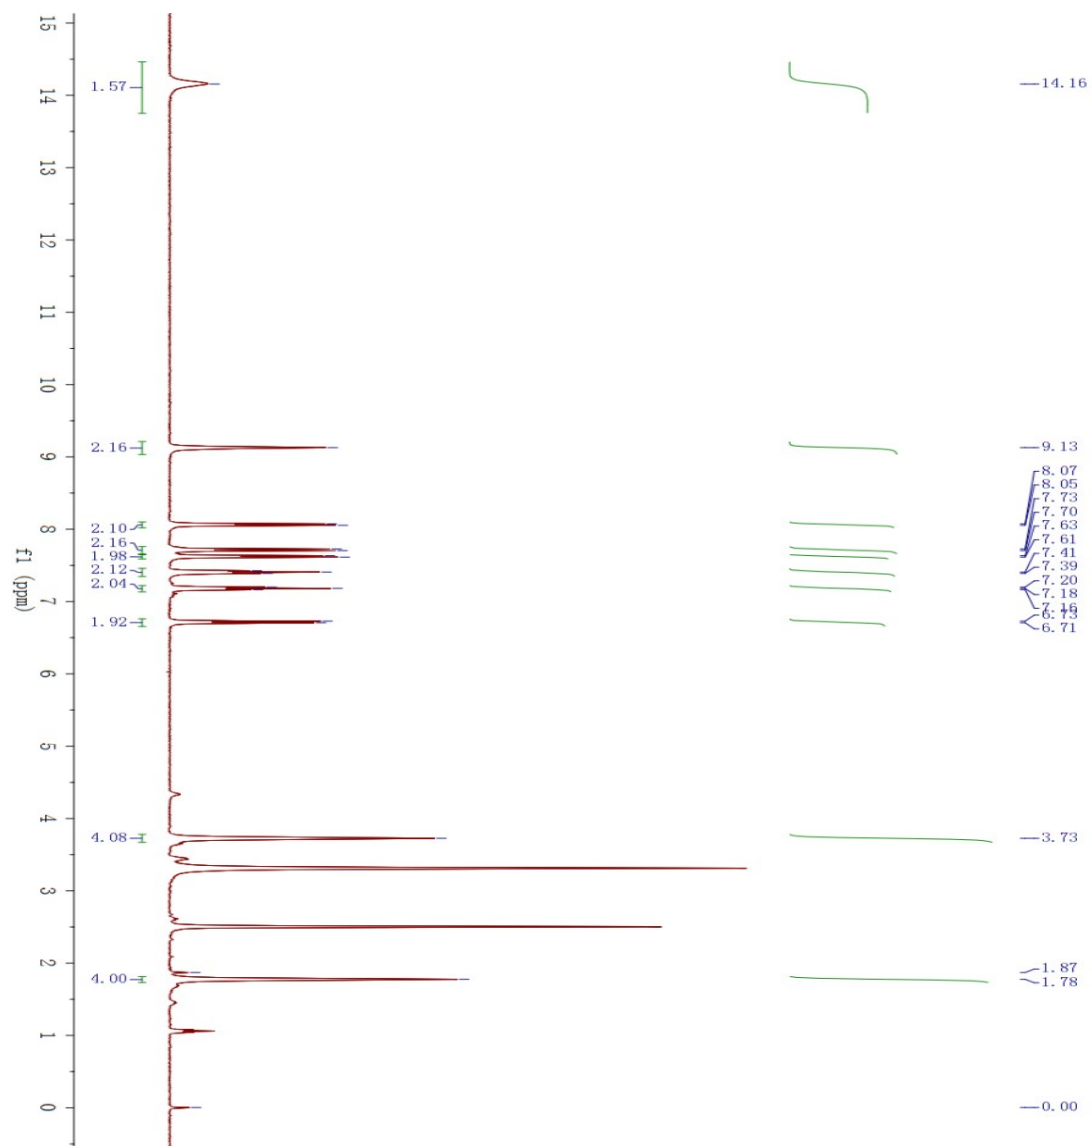

**Fig. S1.**  $^1\text{H}$  NMR spectra of sensor S in  $\text{DMSO}-d_6$ .

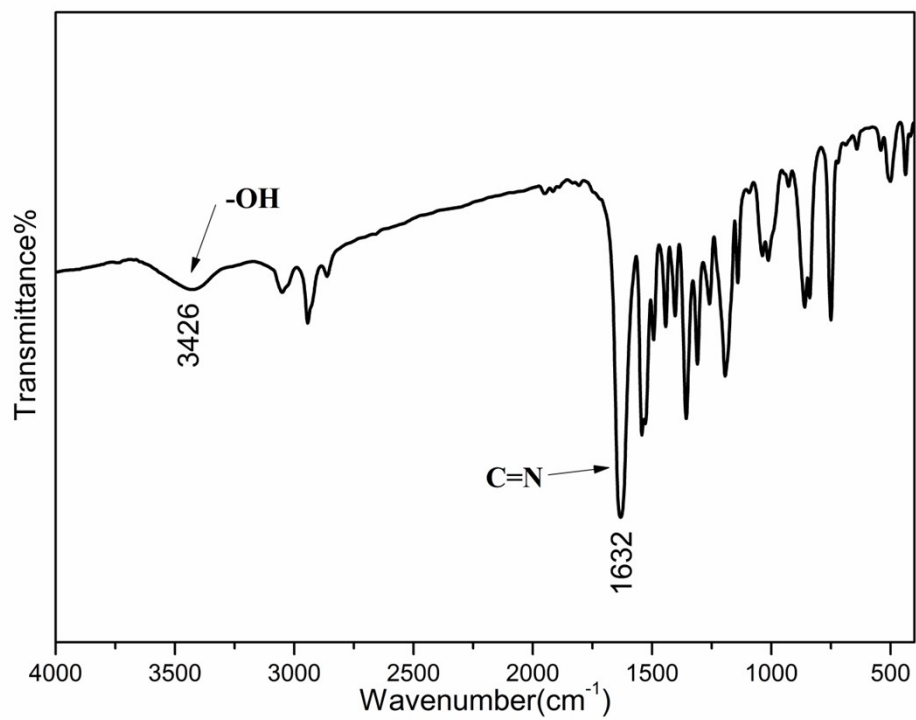

**Fig. S2.** IR spectra of sensor S.

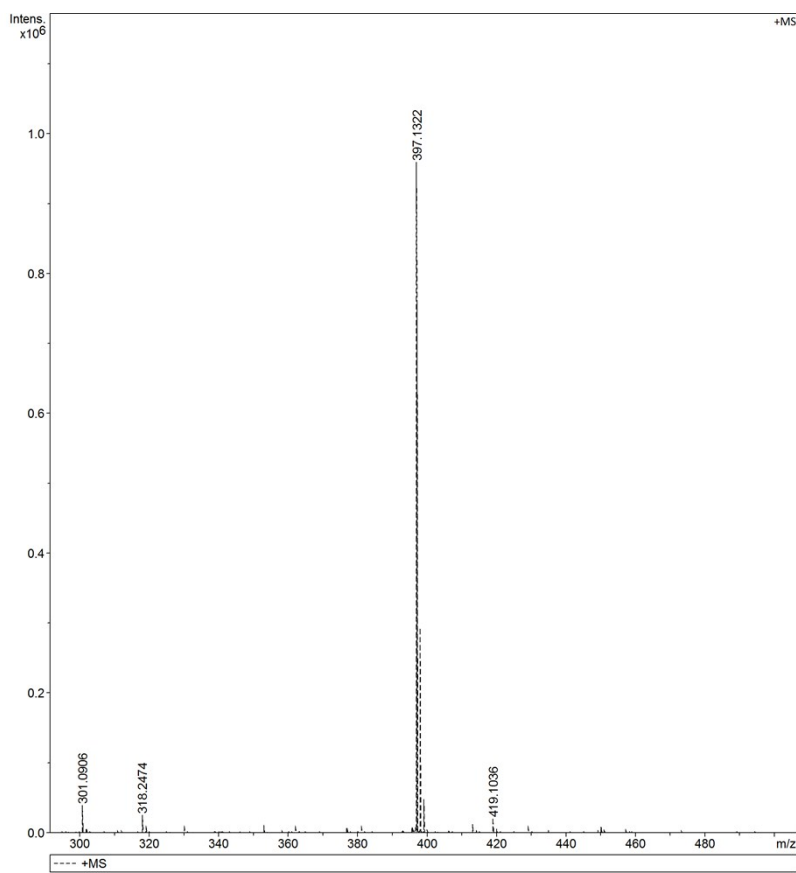

**Figure S3.** MS spectra of sensor S.

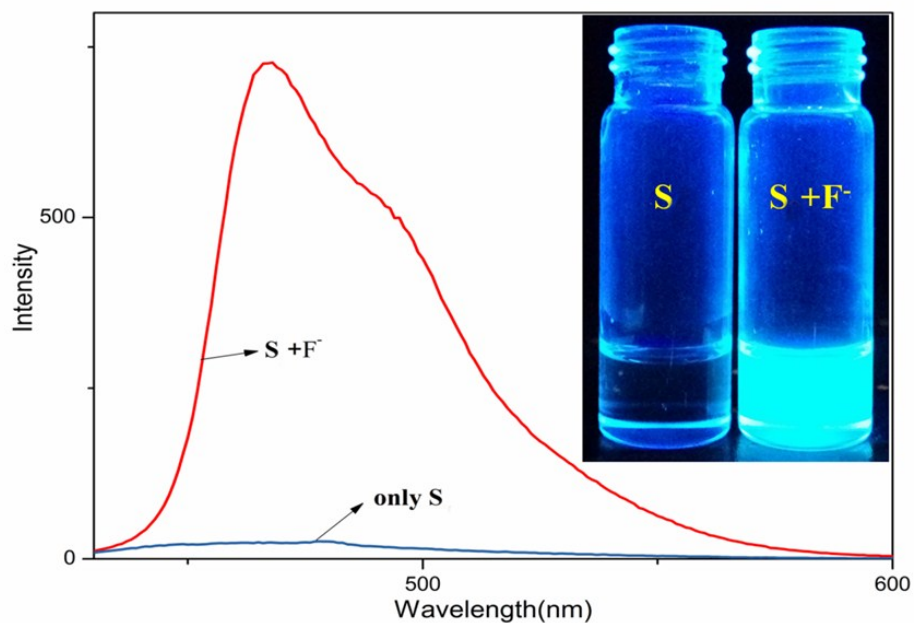

**Fig. S4.** Fluorescence spectra of sensor **S** ( $2.0 \times 10^{-5}$  mol/L) recorded before and after reaction with  $F^-$  (0.01mol/L) (50 equiv). (Inset) Fluorescence changes of the probe **S** ( $2.0 \times 10^{-5}$  mol/L) in the presence of 50 equiv of  $F^-$ .

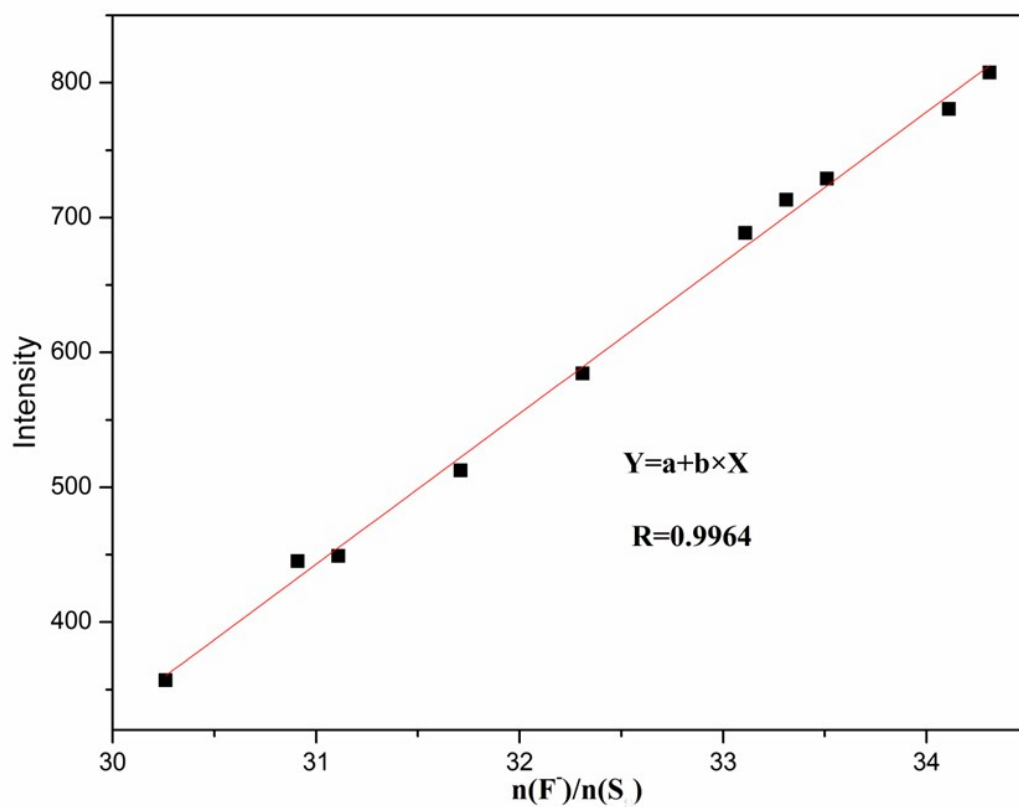

**Fig. S5.** Linear portion of the curve of fluorescence intensity at 467 nm of sensor **S** ( $2.0 \times 10^{-5}$  mol/L) DMSO in the presence of  $F^-$ .

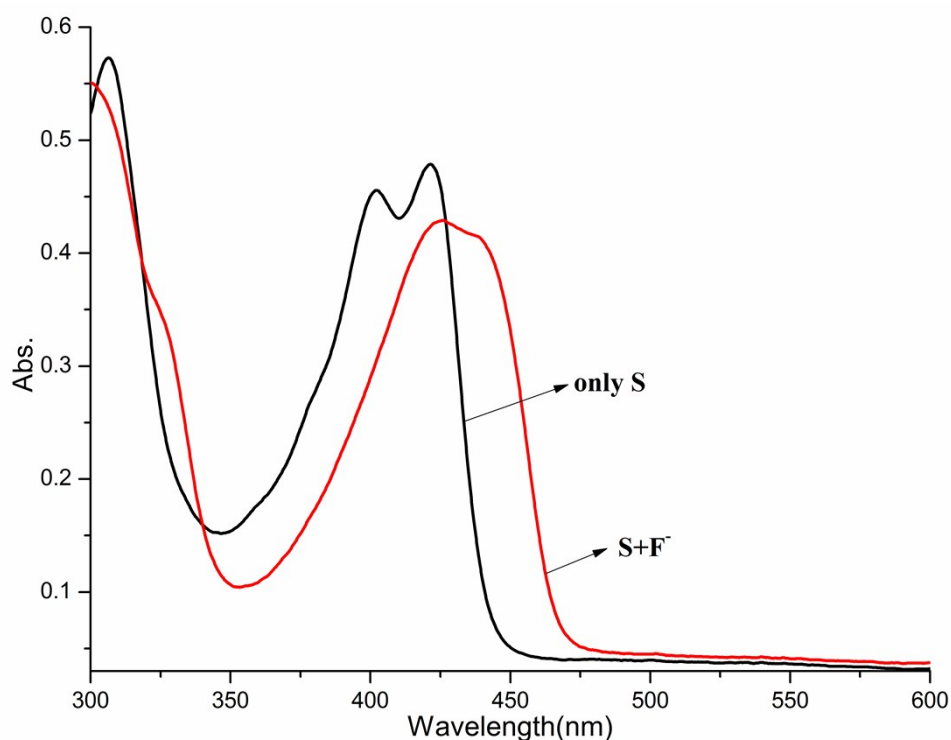

**Fig. S6.** UV/vis absorption spectra of sensor **S** ( $2.0 \times 10^{-5}$  mol/L) in DMSO in the absence and presence of 50 equiv  $F^-$ .

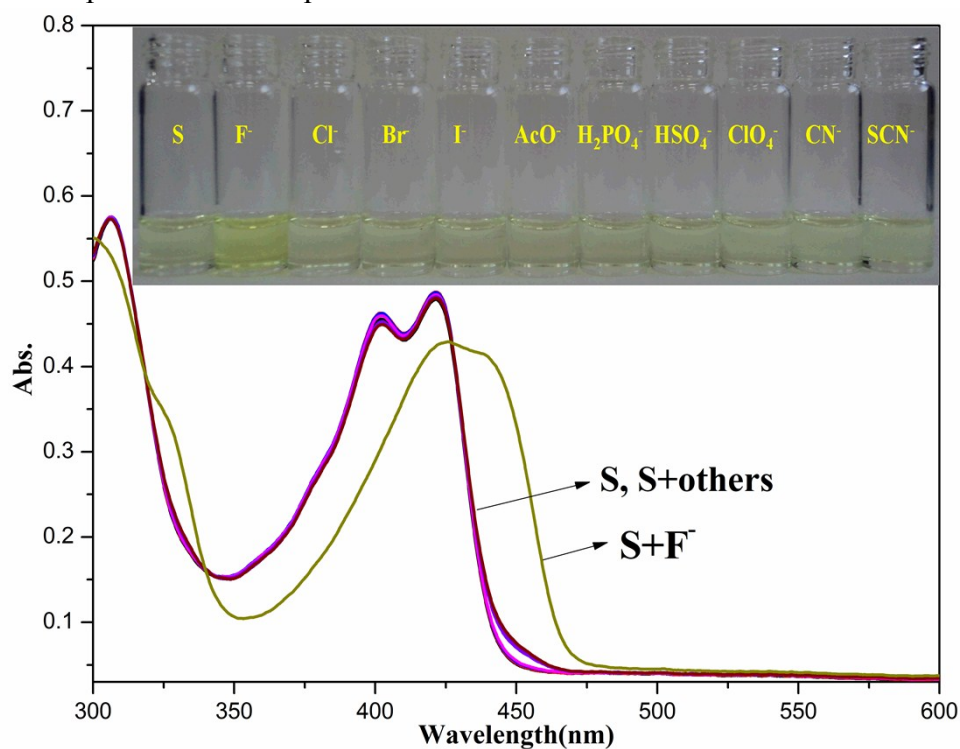

**Fig. S7.** Absorption spectra of sensor **S** ( $2.0 \times 10^{-5}$  mol/L) in DMSO upon addition of various ( $F^-$ ,  $Cl^-$ ,  $Br^-$ ,  $I^-$ ,  $AcO^-$ ,  $H_2PO_4^-$ ,  $HSO_4^-$ ,  $ClO_4^-$ , as the tetrabutylammonium (TBA) salts  $CN^-$  and  $SCN^-$ ; as the sodium salts, 50 equiv each) (0.01 mol/L) in aqueous solution. **(Inset)** Color changes of the sensor **S** ( $2.0 \times 10^{-5}$  mol/L) in the

presence of 50 equiv of ( $F^-$ ,  $Cl^-$ ,  $Br^-$ ,  $I^-$ ,  $AcO^-$ ,  $H_2PO_4^-$ ,  $HSO_4^-$ ,  $ClO_4^-$ ,  $CN^-$  and  $SCN^-$ ).

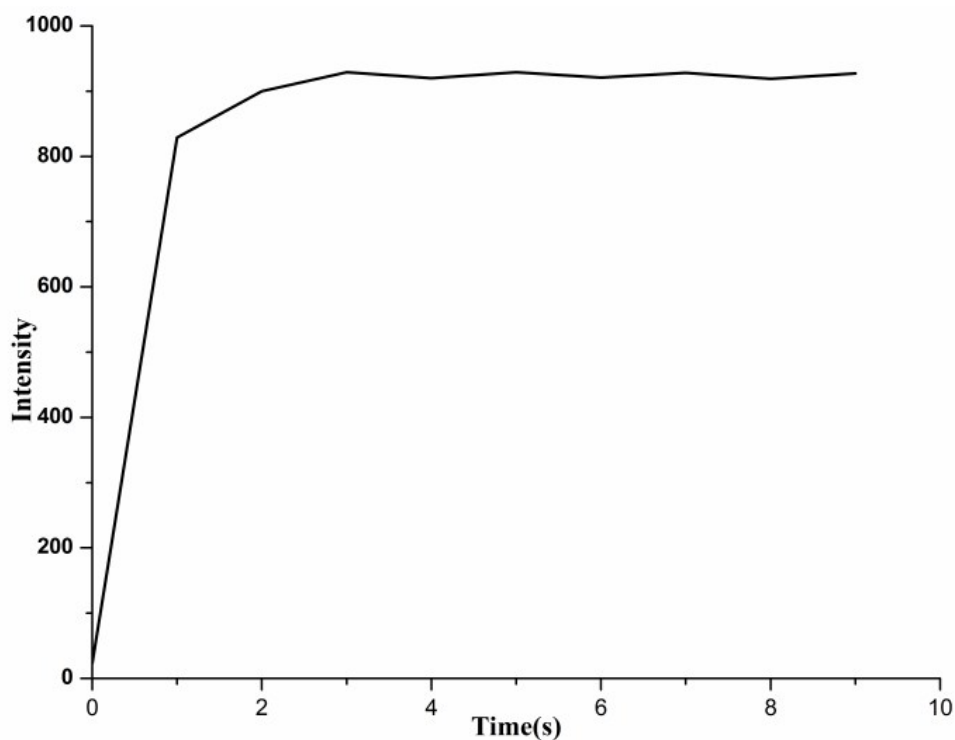

**Fig. S8** Fluorescence intensity at 467 nm for **S** ( $2.0 \times 10^{-5}$  mol/L) in DMSO after addition of  $F^-$  (0.01 M) in aqueous solution.

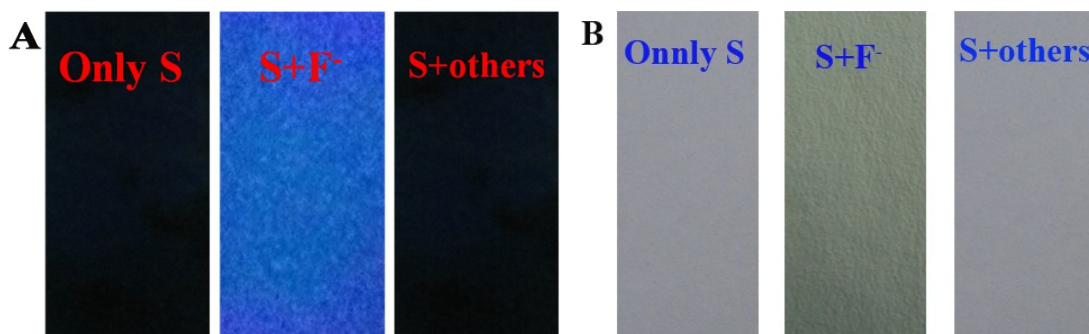

**Fig.S9** Photographs of **S** on test papers (Left) only **S**, (Mid) after immersion into solution with  $F^-$ , (Right) after immersion into solutions with others in absence of  $F^-$  (A) under irradiation at 365 nm (B) under nature light.

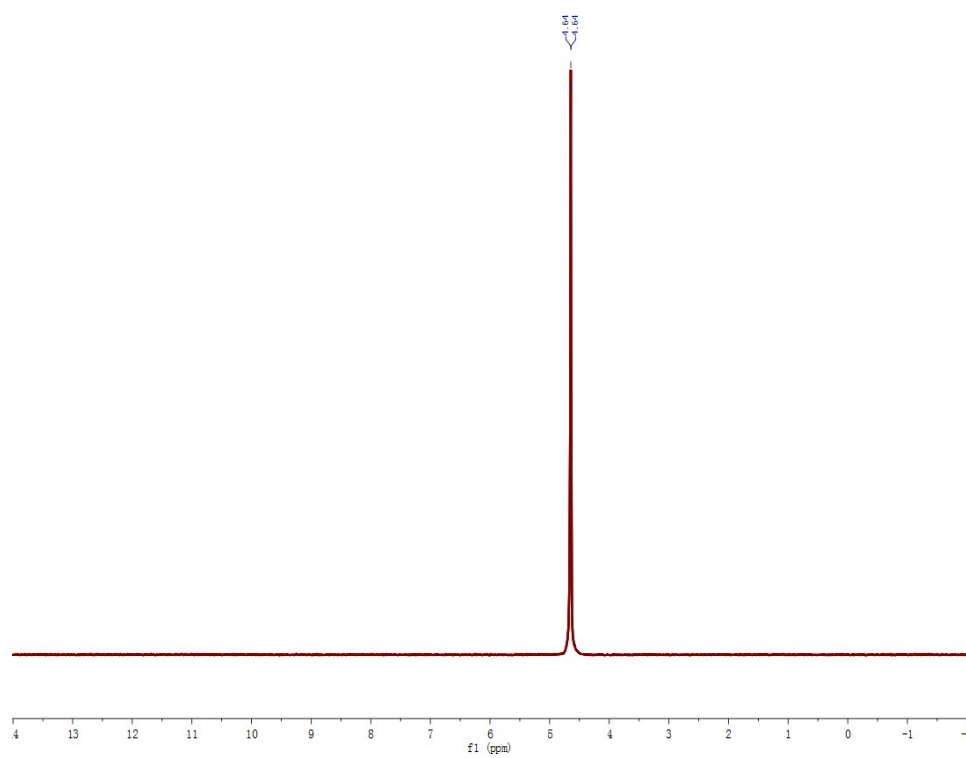

**Fig. S10.**  $^1\text{H}$  NMR spectra of sensor **S** in  $\text{D}_2\text{O}$ .
